# Supplementary material for: Intrauterine growth and the maturation process of adrenal function
Source: PeerJ. 2019 Feb 7;7:e6368. doi: 10.7717/peerj.6368 (PMC6368969; doi:10.7717/peerj.6368)
Supplement: Supplemental Information 1 — Clinical data used in the current study are shown as raw values. [file peerj-07-6368-s001.xlsx]

## Sheet: dataset
infant ID	maternal age	maternal body weight at the time of delivery	maternal BMI at the time of delivery	antenatal steroid	vaginal delivery	intravenous tocolysis	chorioamnionitis	premature rupture of membranes	pregnancy-induced hypertension	multiple pregnancy	male sex	gestational age at birth (week)	birth weight (g)	z-score of birth weight	postnatal age on the day of the study (day)	corrected age on the day of study (week)	body weight on the day of the study (g)	z-score of body weight on the day of the study	1 min Apgar score	5 min Apgar score	intrauterine growth restriction	respiratory support during hospital stay	days on respiratory support	postnatal steroid	breastmilk on the day of the study	exclusive oral feeding on the day of the study	oral feeding (of any dose) on the day of the study	cortisol in the morning	cortisol in the evening
1	38	66.5	25	0	1	0	0	0	0	1	0	34	1858	-0.71	5	34.7	1804	-1.31	8	9	0	1	0	0	0	0	0	8.08	7.11
2	41	78.5	29.9	0	1	0	1	0	0	1	1	37.9	2326	-1.41	1	38	2204	-1.83	9	10	1	1	0	0	0	1	1	10.93	12.24
3	35	45.4	20.2	1	0	1	0	0	0	1	0	27.3	1048	0.52	54	35	1842	-1.35	7	10	0	2	44	0	1	0	1	5.53	3.22
4	27	70.8	31.5	1	0	1	0	0	0	1	1	26	920	0.28	71	36.1	2132	-1.27	5	8	0	2	47	0	1	1	1	4.15	4.78
5	33	63.3	26.5	0	0	1	0	0	0	1	0	36.7	2556	-0.04	7	37.3	2496	-0.55	8	8	0	2	3	0	0	0	1	11.04	11.1
6	31	50.8	21.7	1	1	1	1	1	0	1	0	33.4	1730	-0.82	10	34.9	1769	-1.55	8	9	0	1	0	0	1	0	0	8.41	8.76
7	31	60.5	24.2	0	1	1	0	1	0	1	0	34.3	2312	0.88	4	34.9	2174	0.04	8	9	0	1	0	0	0	0	0	10.29	3.69
8	29	72.7	26.7	0	1	0	0	0	0	1	1	38.6	2184	-2.19	7	39.6	2266	-2.39	9	9	1	1	0	0	0	1	1	3.43	5.62
9	23	40.7	17.6	1	1	1	0	1	0	1	0	34	1756	-1.08	10	35.4	1886	-1.43	9	9	1	1	0	0	1	1	1	8.43	6.82
10	25	57.4	22.4	0	1	1	0	0	0	1	1	33.9	2354	0.81	13	35.7	2294	-0.54	9	9	0	2	5	0	1	1	1	2.51	3.94
11	25	54	21.1	1	0	1	0	0	0	2	0	29.6	1068	-1.26	33	34.3	1593	-1.63	5	8	1	2	32	0	1	0	0	2.55	4.13
11	25	54	21.1	1	0	1	0	0	0	2	0	29.6	1068	-1.26	42	35.6	1922	-1.21	5	8	1	2	32	0	1	1	1	4.05	3.47
12	25	54	21.1	1	0	1	0	0	0	2	0	29.6	1235	-0.36	33	34.3	1852	-0.71	5	7	0	2	21	0	1	0	0	5.88	4.63
12	25	54	21.1	1	0	1	0	0	0	2	0	29.6	1235	-0.36	42	35.6	2138	-0.49	5	7	0	2	21	0	1	0	1	6.23	18.68
13	21	43.9	17.6	0	1	1	0	0	0	1	0	36	1702	-2.15	6	36.9	1712	-2.59	7	9	1	1	0	0	1	1	1	15.92	10.63
14	33	61.7	25.4	0	0	1	0	0	0	2	0	34.1	1930	-0.32	7	35.1	1864	-1.12	7	9	0	1	0	0	1	0	1	2.46	3.92
15	33	61.7	25.4	0	0	1	0	0	0	2	0	34.1	1064	-3.48	8	35.3	1063	-3.97	6	7	1	2	2	0	1	0	0	6.64	4.98
16	37	58.7	25.7	1	1	1	1	0	0	1	0	34	2632	1.85	5	34.7	2430	0.76	9	9	0	1	0	0	0	1	1	6.4	5.17
17	42	68	24.4	1	0	1	0	1	0	1	0	29.7	1230	-0.45	37	35	1830	-1.18	3	7	0	2	45	0	0	0	0	9.93	13.6
18	31	62	26.5	0	0	1	0	0	1	1	1	34.1	2340	0.86	13	36	2384	-0.23	5	7	0	2	4	0	0	1	1	3.29	3.37
19	39	47.4	19.7	1	0	1	1	1	0	1	0	32	1654	-0.22	27	35.7	1954	-1.37	8	8	0	2	4	0	1	0	1	6.77	5.35
20	35	78.5	32.3	0	1	1	0	0	1	1	1	35.3	1814	-1.82	4	35.9	1746	-2.37	9	9	1	1	0	0	0	1	1	17.8	4.62
21	37	54.4	23.2	1	0	1	0	1	0	2	1	28.9	1135	-0.74	38	34.3	1690	-1.71	2	8	0	2	49	0	1	0	0	17.45	14.78
21	37	54.4	23.2	1	0	1	0	1	0	2	1	28.9	1135	-0.74	50	36	1848	-2.1	2	8	0	2	49	0	1	0	1	4.42	3.49
22	35	58.7	25.1	1	1	1	1	1	0	1	0	32.3	1896	0.53	31	36.7	2395	-0.53	8	9	0	1	0	0	0	1	1	9.17	33.6
23	26	55	21.5	1	1	0	1	0	1	1	1	32.3	1648	-0.62	28	36.3	2312	-0.63	8	9	0	1	0	0	1	0	1	9.87	6.72
24	33	70.8	25.7	0	1	1	0	1	0	2	1	35.9	2746	0.73	6	36.7	2695	0.08	7	8	0	1	0	0	0	1	1	10.83	5.13
25	34	63.3	25.4	1	0	1	0	0	1	1	0	33.3	1574	-1.36	5	34	1533	-1.92	8	9	1	1	0	0	0	0	0	8.53	14.19
25	34	63.3	25.4	1	0	1	0	0	1	1	0	33.3	1574	-1.36	15	35.4	1838	-1.6	8	9	1	1	0	0	1	1	1	2.98	2.06
26	33	55.4	24	0	0	1	0	0	0	1	1	31.6	1292	-1.75	32	36.1	2030	-1.58	2	6	1	2	9	0	1	1	1	2.54	8.69
27	29	68	28.3	0	0	1	0	1	0	2	0	34	1942	-0.22	11	35.6	1936	-1.16	8	8	0	1	0	0	1	1	1	3.12	3.36
28	41	65.2	23.9	0	0	1	0	0	0	1	0	34.4	1250	-2.92	5	35.1	1281	-3.12	8	9	1	1	0	0	0	0	0	7.07	27.34
29	32	58.9	22.7	1	0	1	1	1	0	1	1	28.3	1189	0.03	56	36.3	2216	-1.13	3	4	0	2	42	0	1	1	1	3.41	5.19
30	28	58.8	21.1	0	0	1	1	0	0	2	1	36.6	1896	-2.28	7	37.6	1840	-3.02	2	8	1	2	2	0	0	0	1	6.99	28.81
31	40	75	33.3	1	0	1	0	0	1	1	1	32.1	1632	-0.55	22	35.3	1975	-1.18	8	9	0	1	0	0	1	0	1	1.83	7.56
32	22	48.8	20.8	0	0	1	0	0	0	1	1	34.7	2208	-0.2	10	36.1	2186	-1.11	1	5	0	1	0	0	1	0	1	3.47	16.9
33	41	59.4	23.8	0	1	1	0	0	0	2	1	35.1	2267	-0.26	10	36.6	2165	-1.46	8	9	0	1	0	0	1	0	1	4.64	3.91
34	41	59.4	23.8	0	1	1	0	0	0	2	0	35.1	1867	-1.33	10	36.6	2076	-1.48	9	9	1	1	0	0	1	1	1	28.19	29.41
35	17	43	16.8	0	1	0	1	0	0	1	0	32.6	1818	0.2	15	34.7	1867	-0.89	6	7	0	2	2	0	1	0	0	10.78	3.87
35	17	43	16.8	0	1	0	1	0	0	1	0	32.6	1818	0.2	23	35.9	2186	-0.5	6	7	0	2	2	0	1	0	1	17.97	3.47
36	29	61.5	24	1	0	1	0	0	0	1	0	29.7	1479	0.81	32	34.3	1859	-0.89	7	10	0	2	15	0	0	0	0	3.7	5.57
37	37	64.5	23.4	1	1	1	1	1	0	1	1	30.7	1730	0.79	27	34.6	2160	-0.3	8	9	0	2	2	0	1	0	0	4.46	9.18
37	37	64.5	23.4	1	1	1	1	1	0	1	1	30.7	1730	0.79	36	35.9	2498	-0.03	8	9	0	2	2	0	1	1	1	4.09	4.48
38	31	53	22.3	0	0	0	0	0	0	1	0	37.7	1698	-3.43	8	38	1874	-2.97	8	9	1	1	0	0	0	1	1	8.54	11.8
39	40	65.5	24.8	0	0	0	0	1	0	1	1	35.4	2731	1.02	4	36	2516	-0.04	8	9	0	1	0	0	0	1	1	3.89	17.21
40	28	59	23	0	0	1	0	1	0	2	0	34.4	1926	-0.52	11	36	2098	-0.85	8	9	0	1	0	0	0	0	0	4.02	4.61
41	28	59	23	0	0	1	0	1	0	2	0	34.4	1866	-0.73	8	35.6	1928	-1.19	9	10	0	1	0	0	0	0	0	3.83	5.91
42	25	56.9	25.3	0	1	0	1	1	0	1	0	35.9	2236	-0.34	7	36.9	2198	-1.02	8	9	0	1	0	0	1	1	1	3.62	3.93
43	37	78.9	31.1	1	1	1	0	1	0	1	1	33.7	1964	-0.41	15	35.9	2106	-1.25	7	9	0	1	0	0	0	1	1	5.65	31.94
44	22	61.7	24.1	0	0	1	0	0	0	1	0	37.4	2226	-1.45	5	38.1	2182	-1.96	8	9	1	1	0	0	0	1	1	7.13	22.56
45	27	82.6	29.6	1	0	1	0	0	1	1	1	30.9	1097	-2.17	24	34.3	1323	-2.82	8	9	1	2	16	0	1	0	0	2.57	3.9
45	27	82.6	29.6	1	0	1	0	0	1	1	1	30.9	1097	-2.17	37	36.1	1744	-2.29	8	9	1	2	16	0	1	1	1	3.26	6.47
46	25	59.5	25.8	0	1	0	1	1	0	1	1	35	2204	-0.4	9	36.3	2210	-1.15	9	9	0	1	0	0	1	1	1	6.41	8.99
47	31	103.5	40.4	0	1	0	0	0	0	1	0	38.4	2973	0.61	4	39	2945	0.25	8	9	0	1	0	0	1	1	1	3.64	9.76
48	30	58.5	22.9	0	1	1	0	1	0	1	1	35.1	2232	-0.2	6	35.9	2060	-1.21	8	9	0	1	0	0	0	0	1	23.3	51.03
49	28	47	20.9	1	0	1	0	0	0	1	1	27.4	1151	0.58	40	33.1	1662	-1.13	2	8	0	2	42	1	0	0	0	11.79	12.27
50	40	65.9	24.2	0	0	1	1	0	1	1	1	27.7	1106	0.03	28	31.7	1451	-1.13	2	3	0	2	31	1	1	0	0	9.21	7.04
51	29	66	26.4	1	1	1	1	0	0	1	0	23.7	628	0.57	92	36.9	2148	-1.42	4	5	0	2	78	1	0	1	1	4.38	3.23
52	27	46	21	0	0	1	0	0	0	1	0	25	688	-0.25	74	35.6	1914	-1.23	7	8	0	2	60	1	1	0	1	2.68	2.63
53	34	52.5	19.5	1	0	1	1	1	1	1	1	25.7	683	-1.35	62	34.6	1444	-2.69	2	5	1	2	60	1	0	0	0	3.18	3.61
54	23	68.6	26.8	1	0	1	0	1	0	1	0	25	540	-1.75	72	35.3	1845	-1.29	3	6	1	2	71	1	1	0	0	3.35	3.72
55	29	72.1	29.3	0	1	1	1	0	0	1	0	24.1	715	1.06	90	37	1778	-2.42	1	6	0	2	85	1	1	0	0	6.24	16.66
